# Supplementary material for: Inhibition of the RacGEF VAV3 by the small molecule IODVA1 impedes RAC signaling and overcomes resistance to tyrosine kinase inhibition in acute lymphoblastic leukemia
Source: PubMed Central journal article supplement (PMC8885421; doi:10.1038/s41375-021-01455-3), 2021-10-28
Supplement: 41375_2021_1455_MOESM1_ESM.pdf [file 41375_2021_1455_MOESM1_ESM.pdf]

1  
2  
3  
4  
5  
6  
7  
8  
9  
10  
11  
12  
13  
14  
15  
16  
17  
18  
19  
20  
21  
22  
23  
24  
25  
26  
27  
28  
29  
30  
31

## Supplemental Data

### **Inhibition of the RAC Activator VAV3 by the Small Molecule IODVA1 Impedes RAC Signaling and Overcomes Resistance to Tyrosine Kinase Inhibition in Acute Lymphoblastic Leukemia**

**Shailaja Hegde<sup>1,2</sup>, Anjelika Gasilina<sup>1</sup>, Mark Wunderlich<sup>1</sup>, Yuan Lin<sup>1</sup>, Marcel  
Buchholzer<sup>3</sup>, Oliver H.F. Krumbach<sup>3</sup>, Mohammad Akbarzadeh<sup>3</sup>, Mohammad  
Reza Ahmadian<sup>3</sup>, William Seibel<sup>4</sup>, Yi Zheng<sup>1,5</sup>, John P. Perentesis<sup>4</sup>, Benjamin  
Mizukawa<sup>1</sup>, Lisa Privette Vinnedge<sup>4,5</sup>, José A. Cancelas<sup>1,2,5</sup>, and Nicolas N. Nassar<sup>1,5\*</sup>**

<sup>1</sup>: Division of Experimental Hematology and Cancer Biology, Children’s Hospital  
Research Foundation, 3333 Burnet Ave, Cincinnati, OH 45229

<sup>2</sup>: Hoxworth Blood Center, University of Cincinnati Academic Health Center, OH, USA

<sup>3</sup>: Institute of Biochemistry and Molecular Biology II, Medical Faculty, Heinrich-Heine-  
University, Düsseldorf 40225, Germany

<sup>4</sup>: Division of Oncology, Cincinnati Children’s Hospital Medical Center, Cancer and  
Blood Diseases Institute, 3333 Burnet Ave, Cincinnati, OH 45229

<sup>5</sup>: Department of Pediatrics, University of Cincinnati College of Medicine, 3230 Eden  
Ave, Cincinnati, OH 45267

\*: To whom correspondence should be addressed at [nicolas.nassar@cchmc.org](mailto:nicolas.nassar@cchmc.org)

**Disclosure of Potential Conflicts of Interest:** No potential conflicts of interest are  
disclosed by the authors.

32 **Supplemental Results**

33 ***IODVA1 specifically targets BCR-ABL1 B-ALL cells in vitro.*** We tested the efficacy of  
34 IODVA1 in two commonly used Ph<sup>+</sup> cell models, Ba/F3 cells transduced with p190- or  
35 p210-BCR-ABL1 and NALM-1 cells (1). NALM-1 are human lymphoblastic cells that  
36 express p190-BCR-ABL1 but not *Ikaros* (IKZF1) (2). Cells were grown in suspension in  
37 the presence of IODVA1 and counted daily for 3 days by trypan blue exclusion. At 3  $\mu$ M,  
38 IODVA1 reduced the viability of p190- and p210-BCR-ABL1 expressing cells by  $75 \pm 4\%$   
39 (SEM, N = 9) at day 1; viability of Mieg3 empty vector expressing cells was not affected  
40 (**Fig. S1A**). Plot of the concentration-dependent cell survival at the 72-hour time point  
41 shows that IODVA1 inhibits survival of p190-BCR-ABL1-Ba/F3 cells grown in the  
42 presence of IL-3 with an EC<sub>50</sub> of 380 nM (95% CI 302 to 473 nM). IL-3 withdrawal renders  
43 p190-BCR-ABL1 Ba/F3 cells more sensitive to IODVA1 (EC<sub>50</sub> of 9 nM). Survival of  
44 empty vector expressing Ba/F3 cells was not affected by IODVA1 up to 5  $\mu$ M and was  
45 reduced by 25.5% at 20  $\mu$ M (**Fig. S1B**). Similarly, IODVA1 decreases survival of NALM-  
46 1 cells with EC<sub>50</sub> of 677 nM (95% CI 600 to 767.5 nM).

47 To test if the action of IODVA1 is reversible, we washed out IODVA1 post-24-hour  
48 incubation and counted cells for 6 additional days (**Fig. S1C**). As expected, death of p190-  
49 BCR-ABL1 Ba/F3 cells occurred following IODVA1 incubation and persisted even after  
50 IODVA1 removal (washout, arrow). By day 3, allowing for one round of cell division, all  
51 cells were dead, suggesting that IODVA1 triggers an irreversible cell death program.

52 We tested the ability of IODVA1 to inhibit the clonogenic ability of BCR-ABL1  
53 expressing Ba/F3 cells in soft agar. At 10  $\mu$ M, IODVA1 completely abolished colony  
54 formation of Ba/F3 cells transduced with p190-BCR-ABL1 vector (**Fig. S1D**). Colonies

55 are noticeable at 1  $\mu$ M albeit they are smaller than vehicle DMSO control, indicative of  
56 slowed cell division rate.

57

58 ***IODVA1 decreases in vivo leukemic burden and prevents leukemia-related death.*** To  
59 assess the effect of IODVA1 on leukemia burden, we performed flow cytometric analysis  
60 on EGFP<sup>+</sup>/B220<sup>+</sup> progenitors from peripheral blood of vehicle- and drug-treated mice. All  
61 groups had comparable levels of circulating blasts between 12 and 16% at the start of the  
62 treatment (**Fig. S1E**). As the treatment progressed, the number of EGFP<sup>+</sup>/B220<sup>+</sup> cells  
63 decreased to reach 1 to 2% at week 4. Although the data consistently showed a trend for  
64 the IODVA1+imatinib combination to eliminate leukemic burden better than either drug  
65 alone, analysis revealed no statistical significance ( $p = 0.186$ ).

66

67 ***IODVA1 eradicates leukemic propagating activity.*** At the 3- and 5-week time points,  
68 leukemic progenitor cells (EGFP<sup>+</sup>/B220<sup>+</sup>) from the peripheral blood (PB) of secondary  
69 transplanted mice from **Fig. 1D** were analyzed by flow cytometry and plotted as percentage  
70 of total PB for the 10<sup>6</sup>-cell dilution. **Fig. S1F** shows that unlike imatinib-treated mice where  
71 EGFP<sup>+</sup>/B220<sup>+</sup> cells constituted  $23.2 \pm 5.4$  % of B-cells 5 weeks post transplantation,  
72 IODVA1- and IODVA1+imatinib-treated mice had a  $4.2 \pm 0.7$  and  $3.0 \pm 0.3$ %,  
73 respectively, EGFP<sup>+</sup>/B220<sup>+</sup> leukemic B-cells at the same time-point. Similar trends in mice  
74 survival and leukemic burden were obtained for the higher dilutions (**Fig. S1G - S1J**). We  
75 have previously evaluated IODVA1 for any hematological toxicity and detected no adverse  
76 changes in body weight or hematological parameters (3). Together, these data indicate that  
77 IODVA1 eradicates all leukemogenic cells *in vivo*, including the ones responsible for

78 propagation and possibly relapse and that IODVA1 is more efficient than imatinib at  
79 decreasing the leukemic cell burden.

80

81 ***IODVA1 decreases survival of patient-derived leukemia cells.*** Cells from PDX models  
82 representing pediatric Ph<sup>+</sup>, Ph-like with a diverse series of genetic aberrations, and a few  
83 cases of MLL-rearranged B-ALL patients (**Table S1**) generally responded positively to  
84 IODVA1 *ex vivo* (**Fig. S3**).

85 ***Ph<sup>+</sup> B-ALL.*** Cells from patient #2017-58 with a dual Ph<sup>+</sup> (BCR-ABL1) and Ph-like  
86 (P2RY8-CRLF2) rearrangement were treated with ABL1-TKI dasatinib, JAK inhibitor  
87 ruxolitinib, dasatinib and ruxolitinib combination (das + rux), CDK-inhibitor abemaciclib,  
88 or IODVA1 (**Fig. S3A**, left panel). These cells clearly responded to dasatinib, ruxolitinib,  
89 and the combination. IODVA1 was not as potent as it decreased their proliferation by only  
90 40% at 1 μM and had no effect at 0.2 μM. Cells from relapsed patient #2018-136 with Ph<sup>+</sup>  
91 (BCR-ABL1), IKZF1, ΔCDKN2A/B, and ΔPAX5 were similarly treated. Dasatinib (20  
92 nM) reduced the proliferation of #2018-136 cells by 56%; ruxolitinib or abemaciclib (0.1  
93 μM) had no effect. The das+rux combination resulted in 63% decrease in proliferation,  
94 which is likely due to inhibitory action of dasatinib. IODVA1 (0.5 μM) reduced the  
95 proliferation of these cells by 78%. When tested in the colony formation assay, IODVA1  
96 (1 μM) reduced the number of colonies by 60% (p = 0.001) (**Fig. S3A**, middle panels).

97 Original CD19<sup>+</sup> cells from patient #2017-129 with Ph<sup>+</sup> (BCR-ABL1; T315I) and  
98 mutated SETD2, SF3B1, and TP53 who relapsed after initial treatment were treated with  
99 vehicle control, dasatinib, ruxolitinib, (das + rux), and IODVA1. As expected dasatinib,  
100 ruxolitinib, or the combination had no effect on proliferation of the CD19<sup>+</sup> cells (**Fig. S3A**,

101 right panel). In contrast, IODVA1 at 1  $\mu$ M but not at 0.2  $\mu$ M reduced the CD19<sup>+</sup> B-ALL  
102 cell counts by 80%. Additionally, we confirmed that IODVA1 does not exert toxic effects  
103 to cells of normal stroma (**Fig. S3A**, right panel arrows). Thus, IODVA1 decreases the  
104 proliferation of Ph<sup>+</sup> B-ALL (BCR-ABL1) primary cells including cells expressing the TKI-  
105 resistant T315I mutant consistent with our findings that Ph<sup>+</sup> B-ALL (BCR-ABL1) model  
106 cells express high levels of VAV3.

107 The fact that #2017-58 cells did not respond to IODVA1 as well as the other two patient  
108 samples is probably due to the low VAV3 expression and level of phosphorylation (**Fig.**  
109 **6B**) and the existence of other genetic mutations (*e.g.* P2RY8-CRLF2) that promote cell  
110 growth independently of VAV3.

111 ***Ph-like B-ALL.*** Our cohort of samples contained numerous cases of Ph-like disease with  
112 a diverse series of genetic aberrations. Ph-like ALL is a high-risk subset of leukemia that  
113 shares many characteristics of Ph<sup>+</sup> B-ALL and contains a variety of genomic alterations  
114 that activate kinase and cytokine signaling but where BCR-ABL1 is not expressed (4-6).  
115 Our Ph-like patient derived cells generally responded positively to the treatment they  
116 received (**Fig. S3B**). At 1 but not 0.2  $\mu$ M, IODVA1 reduced cell proliferation by at least  
117 95%. The exception was sample #2018-132 which did not respond to any treatment  
118 including the CDK4/6 selective inhibitor abemaciclib. IODVA1 (0.5  $\mu$ M) reduced the  
119 proliferation of these cells by 25% like the other FDA approved drugs. Thus, IODVA1  
120 decreases the proliferation of majority of Ph-like B-ALL primary cells despite their  
121 heterogenous genetic lesions.

122 ***MLL-rearranged B-ALL.*** Cells from #2018-190, an MLL/AF9 fusion, were also treated  
123 with the same drugs. **Fig. S3C** shows that these cells resisted dasatinib, ruxolitinib, and the

124 combination. IODVA1 (0.5  $\mu$ M) and abemaciclib (0.1  $\mu$ M) decreased proliferation of these  
125 cells by 50 and 43%, respectively. Similarly, cells from relapsed patient #2016-116 with  
126 MLL t(1; 11), t(6; 6) responded very well to IODVA1 either with or without combined  
127 SCF/Flt3L/IL-7 cytokine supplementation.

128

129 ***IODVA1 decreases RAC activity and downstream signaling.*** To determine the effective  
130 concentration that decreases RAC activation (7, 8), p190-BCR-ABL1 Ba/F3 cells (9-11)  
131 were incubated with IODVA1 (0.1 – 10  $\mu$ M) for 1 h, followed by GST-PAK-GBD  
132 pulldown. **Fig. S4A** shows that IODVA1 decreases levels of active RAC with an IC<sub>50</sub> of  
133 1  $\mu$ M. We also tested the activation of the two related GTPases, CDC42 and RHOA.  
134 IODVA1 (3  $\mu$ M) decreases the levels of active CDC42 by 60% at 15 min and totally  
135 inhibits it at 30 min incubation time. Pull-downs with the Rho-binding domain of Rhotekin  
136 show that IODVA1 has no effect on RHOA activation (**Fig. S4B**), consistent with our  
137 previous observations (3).

138

139 ***IODVA1 does not interfere with RAC-specific GAP or GDI functions.*** RAC activity and  
140 signaling (12-22) is regulated by RAC-specific GAPs, GDIs, and GEFs. We argued that  
141 the decrease in RAC activity might be caused by IODVA1 targeting one RAC regulator.  
142 First, we tested *in vitro* if IODVA1 stimulates the activity of the RAC negative regulator  
143 p50GAP. RAC was loaded with the fluorescently-labeled tamraGTP and the stimulated  
144 increase in GTP-hydrolysis by the C-terminal GAP homology of p50GAP was monitored  
145 by stopped-flow fast kinetics for 3 s. **Fig. S4E** shows that the initial decrease in  
146 fluorescence, which is coupled to GTP-hydrolysis, does not change in the presence ( $k_{\text{obs}} =$

147 5.7) or absence ( $k_{\text{obs}} = 6.6$ ) of high IODVA1 concentration (50  $\mu\text{M}$ ). We thus conclude that  
148 IODVA1 does not stimulate the activity of p50GAP to explain the observed decrease in  
149 RAC activity.

150 Second, we tested if IODVA1 increases the detachment of RAC1 from membranes thus  
151 making it unavailable for activation by GEFs. We studied the displacement of prenylated  
152 RAC1-GDP from synthetic liposomes by GST-RhoGDI1 in the presence and absence of  
153 IODVA1 using liposome sedimentation assay (23). GST-RhoGDI1 (4  $\mu\text{M}$ ) was added to  
154 liposome containing phosphatidylinositol 4,5-bisphosphate ( $\text{PIP}_2$ ) and prenylated RAC1-  
155 GDP (1  $\mu\text{M}$ ) in the absence or presence of IODVA1 and further incubated on ice for 30  
156 min. Samples were centrifuged at 20,000 x g for 20 min at 4°C and pellet (p) and  
157 supernatant (s) fractions were collected and immunoblotted for RAC1. Addition of  
158 IODVA1 (2  $\mu\text{M}$ ) did not affect prenylated-RAC1 displacement by RhoGDI1 from  
159 liposomes (**Fig. S4F**, lanes 2 and 3). We then measured the interaction between  
160 fluorescently labeled RAC1 and RhoGDI1 using stopped-flow fast kinetics techniques.  
161 The stopped-flow data show that the observed binding affinity between the two proteins  
162 did not significantly change in the presence of IODVA1 ( $k_d = 0.078 \mu\text{M}$ ) or vehicle control  
163 ( $k_d = 0.1 \mu\text{M}$ ), even though the two proteins interact with a different amplitude (**Fig. S4G**).  
164 Taken together, IODVA1 does not interfere with RhoGDI binding to RAC1 or with its  
165 ability to extract prenylated-RAC1 from  $\text{PIP}_2$ -containing membranes.

166

167 *Vav3-deficient leukemic cells do not respond to IODVA1 in vitro and in vivo.* To further  
168 validate VAV3 as target of IODVA1, we studied the effects of IODVA1 on leukemic cells  
169 from the Vav3-deficient (*Vav3*<sup>-/-</sup>) mice previously published (9, 24, 25). We argued that if

170 IODVA1 targets VAV3, then  $Vav3^{-/-}$  cells should be significantly less sensitive to its  
171 action. We tested if the lack of response to IODVA1 by  $Vav3^{-/-}$  cells holds *in vivo*. We  
172 transplanted wild-type ( $Vav3^{+/+}$ ) or  $Vav3^{-/-}$  LDBM cells transduced with p190-BCR-ABL1  
173 retrovirus into lethally irradiated C57BL/10 mice (N = 5 per group), waited 21 days for the  
174 leukemia to develop, and treated the mice with either vehicle control or IODVA1  
175 administered through osmotic pumps as before (**Fig. S5A**). Because the mice died shortly  
176 post leukemia transplantation, all groups were treated for 14 days only, *i.e.* all treatments  
177 started at day 21 and ended by day 35. Kaplan-Meier survival plots show that, as expected,  
178 mice transplanted with wild-type leukemia and treated with vehicle control die between  
179 days 33 and 38. Mice treated with IODVA1 survive until day 60, *i.e.* 25 days after treatment  
180 has ended. Compared to mice receiving vehicle control where leukemic progenitors  
181 constituted 23.8% of peripheral blood cells, mice treated with IODVA1 showed drastic  
182 reduction of levels of leukemic progenitors to 5% and 2% after one week and two weeks  
183 of IODVA1 treatment, respectively (**Fig. S5B**, dark lilac bars). These *in vivo* data are  
184 consistent with **Fig. S1E** and with the hypothesis that IODVA1 eliminates leukemic  
185 progenitor cells responsible for disease propagation despite the short treatment time. Mice  
186 transplanted with  $Vav3^{-/-}$  leukemia and treated with vehicle control or IODVA1 (**Fig. S5A**,  
187 grey and light lilac lines, respectively) die between days 34 and 42 and days 40 and 44,  
188 respectively. Thus, IODVA1 had no significant effect on  $Vav3^{-/-}$  leukemic mice ( $p = 0.41$ ).  
189  $Vav3^{-/-}$  leukemic mice have an increased survival compared to their wild-type leukemic  
190 counterpart, consistent with our previous observations (24). This can also be seen in the  
191 level of peripheral blood leukemic progenitor cells that kept increasing in  $Vav3^{-/-}$  leukemic  
192 mice treated with IODVA1 or vehicle control (**Fig. S5B**).



193 The observation that mice engrafted with *Vav3*<sup>-/-</sup> leukemia die by day 44 while mice  
194 engrafted with normal leukemia and treated with IODVA1 survive until day 60 even after  
195 treatment has ended suggests that leukemic cells in the *Vav3*<sup>-/-</sup> background rely on  
196 alternative pathways to survive. To test this hypothesis, we studied by phospho-flow  
197 cytometry the activity of several effectors in BM cells from one-week treated mice. The  
198 phosphorylation levels of the VAV3/RAC effectors JNK and PAK1 are severely reduced  
199 in IODVA1-treated mice regardless of VAV3 status (**Fig. S5C**). The levels of pJNK and  
200 pPAK1 in *Vav3*<sup>-/-</sup> leukemia are not affected by IODVA1 and are similar to IODVA1-treated  
201 wild-type leukemia. Interestingly, the phosphorylation levels of the non-VAV3/RAC  
202 effectors AKT and STAT3 are not only unaffected by IODVA1 in wild-type leukemia as  
203 seen before in **Fig. 3B & 6A** but significantly increased in *Vav3*<sup>-/-</sup> leukemia. This  
204 observation suggests that *in vivo*, *Vav3*<sup>-/-</sup> leukemic cells are not only unresponsive to  
205 IODVA1 but rely among others on STAT3 signaling for survival.

206

207 **ACKNOWLEDGMENTS.** We thank Drs. Marie-Dominique Filippi, Damien Reynaud,  
208 Daniel Starczynowski, and their lab members for valuable advice, Dr. Yuting Tang for help  
209 with figure preparation, and Ashley Wellendorf for retrovirus preparation and mouse  
210 colony maintenance. We thank Drs. Xosé R. Bustelo and Myriam Cuadrado (University of  
211 Salamanca, Spain) for sharing VAV3 antibody and VAV3 expression constructs. This  
212 project was funded by NIH grants (R01CA115611 to N.N.N. and R01CA237016 to N.N.N.  
213 and J.A.C., and R50CA211404 to M.W.), an American Society of Hematology Bridge  
214 Award (N.N.N.), Translational Research Program grants from the Leukemia Lymphoma  
215 Society (6076-14 and 6264-13 to N.N.N. and J.A.C.), an Affinity Group Award from the  
216 Cincinnati Cancer Center (N.N.N. and J.A.C.), a FY19 Cincinnati Children’s Innovation  
217 Fund award (N.N.N. and J.A.C.), a CancerFree Kids Pediatric Cancer Research Alliance  
218 award (N.N.N.), an award from the National Center for Advancing Translational  
219 Sciences of the National Institutes of Health, under Award Number  
220 2UL1TR001425-05A1 (N.N.N.), the German Research Foundation (Deutsche  
221 Forschungsgemeinschaft; AH 92/8-1 to M.A. and M.R.A.), the European Network on  
222 Noonan Syndrome and Related Disorders (NSEuroNet, 01GM1621B to O.H.F.K. and  
223 M.R.A.), the German Federal Ministry of Education and Research (BMBF) – German  
224 Network of RASopathy Research (GeNeRARE, 01GM1902C to M.R.A.), and the  
225 International Research Training Group 1902 Intra- and Interorgan Communication of the  
226 Cardiovascular System (IRTG 1902-P6 to M.B. and M.R.A.).

227

## 228 **Supplemental Methods**

229

230 **Plasmids, Cell Lines, and Reagents:** Plasmid set for purification of fixed-arm carrier  
231 fusions pMalX (A-E) was a kind gift from Dr. Lars C. Pedersen (NIEHS), pET28b-N<sub>9</sub>-  
232 MBP-mOrange plasmid (#29748) was from Addgene (Watertown, MA), chaperone co-  
233 expression plasmid set was from TaKaRa Bio USA (Mountain View, CA). Primers were  
234 from Integrated DNA Technologies (Coralville, IA). Restriction enzymes, polymerases,  
235 cloning assembly kits and competent cells were from New England Biolabs (Ipswich,  
236 MA). Cytokines were from Peprotech (Rocky Hill, NJ).

237 Cell lines were purchased from American Type Culture Collection (ATCC, Manassas, VA)  
238 or German Collection of Microorganisms and Cell Cultures (DSMZ, Braunschweig,  
239 Germany) and were not further authenticated. The cell lines are not registered as commonly  
240 misidentified cell lines. Cells are routinely checked for mycoplasma by PCR. Ba/F3 cells  
241 were cultured in RPMI (ThermoFisher) supplemented with 10% FBS and IL-3 (10 ng/ml),  
242 NALM-1 cells were maintained in RPMI supplemented with 15% FBS. HEK293T cells  
243 were maintained with DMEM supplemented with 10% FBS and 1%  
244 penicillin/streptomycin. All cell lines were cultured at 37°C in a 5% CO<sub>2</sub> humidified  
245 incubator. Cell viability was assessed by trypan blue exclusion as previously described (3).

246 The following antibodies were used: GAPDH (#627408, GeneTex, Irvine, CA), pERK1/2  
247 (#4370), pAKT (#9271 and #9018), c-Abl (#2862), CDC42 (#2462), RHOA (#2117),  
248 pPAK1/2 (#2601S), pS6 (#4851S), PAK1 (#2602S), pBAD (#4366), and BAD (#9292),  
249 pCrkL (#3181), CrkL (#3182), anti-mouse HRP (#7076), anti-rabbit HRP (#7074) were  
250 from Cell Signaling Technologies (Danvers, MA), pVAV1 (Y174) (#ab76225),

251 pVAV3(Y173) (#ab109544), total VAV3 (#ab203315) were from Abcam (Cambridge,  
252 MA). Total VAV3 antibody was also graciously shared by Dr. Xosé Bustelo's laboratory,  
253 pJNK (Alexa Fluor 647 conjugated, #562481), p-p38 (PE-conjugated, #612565), RAC2  
254 (#610850), pSTAT3 (#55385), and pSTAT5 (Alexa Fluor 647 conjugated, #612599), and  
255 B220 APC-Cy7 antibody (#552094) were from BD Bioscience (San Diego, CA), anti-  
256 phosphotyrosine antibody (#05321) was from Millipore Sigma (St. Louis, MO), p4EBP1  
257 (PE-conjugated, #12-9107-42) was from ThermoFisher. Anti-human CD19 APC-Cy7  
258 (#363009) and anti-human CD45 FITC (#304005) were from BioLegend (San Diego, CA).  
259 Lipids (Phosphatidylserine (PS), Phosphatidylcholine (PC), phosphatidylethanolamine  
260 (PE) and sphingomyelin (SM), and phosphatidylinositol 4,5-bisphosphate (PIP<sub>2</sub>) for  
261 membrane displacement assays were from Avanti Polar Lipids (Darmstadt, Germany).  
262 **Chemicals:** IODVA1 and its biotinylated analog were synthesized by WuXi AppTech  
263 (Hong Kong) from 2-guanidinobenzimidazole and purified as described (3) but at 20 °C.  
264 Imatinib methanesulfonate salt (#I-5508), dasatinib (#D-3307), and ponatinib (#P-7022)  
265 were from LC Laboratories (Woburn, MA), ruxolitinib (#S1378) from Selleck Chemicals  
266 (Houston, TX).

267

268 **Osmotic pump implantation and survival analysis:** Osmotic pumps (ALZET) were  
269 prepared according to manufacturer's protocol. When leukemic burden reached 12-14% in  
270 peripheral blood, mice were stratified into different groups. Leukemic mice were  
271 anesthetized and osmotic pumps with indicated drugs were surgically implanted  
272 subcutaneously on the back of the mouse. Each pump lasted 14 days.

273 Impaired mobility/limb paralysis, interference with vital physiological functions and  
274 labored breathing, hunched abnormal posture, significant weight loss and hematological  
275 signs indicative of organ failure were used as humane endpoints.

276

277 **Viral Particle Production, Transduction and Transplantation:** Production of lentivirus  
278 and retrovirus for stable transduction of murine and human cells were done as described  
279 previously (26). Retroviral and lentiviral vectors, viral transduction of cell lines and mouse  
280 LDBM, and transplantation of transduced leukemic cells were previously described (24).

281 For VAV3 rescue experiments, low density bone marrow cells from wild-type (*Vav3<sup>+/+</sup>*)  
282 or *Vav3<sup>-/-</sup>* mice were transduced with bicistronic retroviral vector encoding p190-BCR-  
283 ABL1-IRES-YFP and sorted for YFP<sup>+</sup> 48 h post-transduction. Cells were then transduced  
284 with lentiviral particles encoding either empty vector, full-length WT or mutant VAV3  
285 (pCDH1-MCS1-EF1-copGFP). Cells were sorted for GFP<sup>+</sup>/YFP<sup>+</sup> and treated with  
286 IODVA1 at the indicated concentrations. Cell cycle was analyzed at 18 h post BrdU  
287 incorporation.

288

289 **Flow Cytometry and Cell Cycle Analysis:** Red blood cells were removed from the  
290 peripheral blood samples using fixative-free lysis buffer (BD Biosciences). After a single  
291 wash in PBS, cells were stained with anti-B220 APC-Cy7 antibody. Stained cells were  
292 washed once and analyzed by flow cytometry. Cell cycle was analyzed via *in vitro* BrdU  
293 incorporation (BD). Briefly, leukemic progenitors were incubated with 1 mM BrdU  
294 solution for 45 minutes, cells were further fixed and permeabilized. DNase treatment was  
295 done according to the instructions and stained with anti BrdU and apoptosis was analyzed

296 by 7-AAD staining through flow cytometry analysis. Analysis was performed using  
297 FACSCanto (BD Biosciences) at the CCHMC Research Flow Cytometry Core.

298

299 **SDS-PAGE, Pull-down Assays, and Immunoblotting:** For analysis of GTPase status,  
300 exponentially growing cells, treated with either vehicle or IODVA1 at the indicated  
301 concentrations and time points, were subjected to active GTPase pulldown kits using GST-  
302 PAK1-GBD or GST-Rhotekin (ThermoFisher). Protein complexes were separated on SDS-  
303 PAGE and immunoblotted with anti-RAC1, anti-CDC42 and anti-RHOA antibodies that  
304 came with the kit. For analysis of VAV3 binding to biotinylated IODVA1, recombinant  
305 VAV3 or lysates from PDX specimens were subjected to neutravidin pulldowns, followed  
306 by SDS-PAGE and immunoblotting analyses.

307 For analysis of expression and cell signaling, cells were subjected to lysis and  
308 immunoblotting, as described previously (24, 26). Relative signals were normalized to the  
309 unstimulated conditions after normalization to the total protein amount. Quantification was  
310 performed using Li-COR Image Studio (Lincoln, NE) or ImageJ (NIH, Bethesda, MD).

311

312 **Recombinant Protein Cloning, Expression and Purification:** For bacterial expression,  
313 full-length VAV3 was cloned as an MBP-fusion protein into pMalX(E) vector with N-  
314 terminal AAAA, AAAASEF or AAAASEFGS linkers using HiFi assembly (NEB). N-  
315 VAV3 (aa 1-575) was cloned as a His<sub>6</sub>-tagged protein into pProEx-HTB vector. All  
316 constructs were verified using Sanger sequencing using CCHCM DNA Core. To minimize  
317 aggregation and improve on quality of purified protein, the expression clones were tested  
318 with chaperone plasmids according to the manufacturer's protocol (Takara Bio USA).

319 For production of recombinant full-length and truncated VAV3, plasmids were co-  
320 transformed with chaperone plasmid Gro7 groEL-groES in BL21 (DE3) or T7 Express.  
321 Cultures were grown in LB, supplemented with metal mix. Protein was purified using Ni-  
322 IMAC chromatography, followed by size-exclusion gel filtration (HiLoad Superdex 200  
323 16/60, GE Healthcare, Chicago, IL ). Post SDS-PAGE analysis, fractions containing VAV3  
324 were pooled, concentrated to ~10 mg/mL and flash frozen in liquid nitrogen. Final yield  
325 was 10-20 mg per 6 L of culture. Recombinant LARG (DH/PH) was purified as His<sub>6</sub>-MBP-  
326 fusion protein using IMAC, followed by size-exclusion gel filtration as above.

327

328 **Recombinant Protein Cloning, Expression and Purification:** Human *RAC1* (GenBank  
329 accession n° NM\_006908.4) was subcloned as N-terminally His<sub>6</sub>-tagged construct into  
330 pFastBacHTB vector (ThermoFisher). Full-length human RAC1 was purified from  
331 baculovirus. RAC1 was produced in TNAO38 insect cells and purified using Ni-IMAC  
332 chromatography.

333

334 **RhoGDI Extracting Prenylated RAC1 from Liposomes:** Displacement of prenylated-  
335 RAC1-GDP from synthetic liposomes by GST-RhoGDI1 in the presence and absence of  
336 IODVA1 was studied using liposome sedimentation assay as in (23). Briefly, liposomes  
337 were generated by using a defined composition of lipids (194 µg) containing 39% w/w  
338 phosphatidylethanolamine, 16% w/w phosphatidylcholine, 36% w/w phosphatidylserine,  
339 4% sphingomyelin, and 5 % w/w phosphatidylinositol 4,5-bisphosphate. Prenylated  
340 RAC1-GDP (1 µM) was added to liposomes suspended in protein buffer (20 mM Hepes,  
341 pH 7.4, 150 mM NaCl, 5 mM MgCl<sub>2</sub>, 3 mM DTT) and incubated for 20 min on ice. GST-

342 RHO GDI1 (2  $\mu$ M) in the absence or presence of IODVA1 was added to the  
343 liposome/prenylated RAC1 and further incubated on ice for 30 min. The samples were then  
344 centrifuged at 20,000 x g for 20 min at 4 °C. Pellet and supernatant fractions were collected,  
345 separated on SDS-PAGE and immunoblotted for RAC1.

346

347 **Stopped-flow Spectrometry:** GTPase assay and nucleotide exchange reaction were  
348 performed with a SF-61 stopped-flow instrument (TgK Scientific, Bradford-on-Avon,  
349 United Kingdom) as described (27) The excitation wavelengths were 543 nm and 362 nm  
350 for tamraGTP and mantGppNHp, respectively. For GTPase assay, equal volumes (600  $\mu$ l)  
351 of 0.2  $\mu$ M RAC1- tamraGTP and 10  $\mu$ M of p50GAP were used. GTPase assay as well the  
352 protein-protein interaction were performed in presence of 5% DMSO.

353

354 **Microscale Thermophoresis (MST):** Purified VAV3, LARG or RAC (1  $\mu$ M) were  
355 incubated with the indicated concentrations of IODVA1 at room temperature for 30 min.  
356 We argued that if IODVA1 binds other targets, it is likely to bind to proteins with common  
357 motives and we tested the DH/PH domain of LARG. Samples were loaded into Zero  
358 Background MST Premium Coated capillaries and binding events were measured on  
359 Monolith NT.LabelFree (NanoTemper Technologies, Munich, Germany). Binding data  
360 were analyzed using Thermophoresis or Thermophoresis with Temperature Jump analysis.  
361 Data were normalized using fraction-bound binding. The 95% confidence interval for  $K_d$   
362 values was 0.27 to 0.98  $\mu$ M for VAV3, 5.9 to 10.37  $\mu$ M for LARG, and 19.6 to 105.8  $\mu$ M  
363 for RAC.

364



365 **CFU-proB Assay:** B-cell lineage colony-forming units (CFU-proB) were quantified post  
366 9-day culture of leukemic BM cells or sorted for p190-BCR-ABL1-expressing B-cell  
367 progenitors in M3134 methylcellulose (StemCell Technologies, Cambridge, MA)  
368 supplemented with 30% FBS, 2 mM L-glutamine and 1% penicillin-streptomycin  
369 (Invitrogen), 100  $\mu$ M  $\beta$ -mercaptoethanol (Fisher-Scientific), 1% BSA (Sigma-Aldrich), 20  
370 ng/mL of recombinant mIL-7 and 100 ng/mL of recombinant mSCF (PeproTech).

371

372 **Ex vivo Drug Treatment of Clinical Samples:** For analysis of proliferation during drug  
373 treatment, spleen preparations from mice successfully engrafted with B-ALL were co-  
374 cultured with MS-5 or OP9 stroma in MEM $\alpha$  media supplemented with 20% FBS and 10  
375 ng/mL recombinant human SCF (Kit-L), Flt3L, and IL-7 (KF7). Drug treatment was started  
376 24 h after initial seeding. Co-cultures were collected by trypsinization after 7 days and cell  
377 counts were performed with trypan blue. Flow Cytometry was performed with anti-mouse  
378 CD45-APC-Cy7 (#557659), anti-human CD45-FITC (#561865) (BD Biosciences,  
379 Franklin Lakes, NJ), anti-human CD19-VioBlue (#130-113-172) and 7-AAD (#130-111-  
380 568) (Miltenyi Biotec, Bergisch Gladbach, Germany) to determine percentage of human  
381 ALL in the cultures. Total absolute ALL cell numbers were determined by multiplying cell  
382 counts by percentage human ALL cells.

383

384 **Statistical Analysis:** Statistical analyses were performed in Prism v.8 (GraphPad  
385 Software, San Diego, CA). Additionally, *Essential Statistics for the Pharmaceutical*  
386 *Sciences* (Philip Rowe) was consulted to choose appropriate statistical tests. Comparison  
387 of two groups was carried out using Student's t-test, comparison of datasets with more than

388 two groups was carried out using One- or Two-way ANOVA, as appropriate, with  
389 recommended multiple comparisons tests. Animal studies were planned to provide 60-80%  
390 power for a target effect size of 1.2-1.5. A sample size of 5-6 mice per group and  
391 experimental replicate was calculated and used; see figure legends for specific sample  
392 sizes, noted as “N.” Animals with higher number of circulating leukemic progenitors were  
393 assigned to the treatment group, animals with lower numbers of progenitors were assigned  
394 to the vehicle control group. No blinding or randomization was done. For cell viability and  
395 proliferation studies in liquid culture and methylcellulose/soft agar of p190-BCR-ABL1-  
396 transformed cells, experiments were performed in triplicates (3 technical replicates) at least  
397 3 times (3 independent experiments). Pull-down, immunoprecipitation and immunoblot  
398 experiments were repeated at least twice. In figures summarizing animal survival data, each  
399 point on a Kaplan-Meier curve represents one mouse, in figures summarizing cell  
400 experiments, data are presented as mean  $\pm$  standard deviation, unless otherwise noted in  
401 the legend. No data were excluded from analysis. Alpha was set to 0.05. Two-sided tests  
402 were used. Results of statistical tests are presented as p-value nominations, where \*  
403 corresponds to  $p \leq 0.05$ , \*\* to  $p \leq 0.01$ , \*\*\* to  $p \leq 0.001$ , \*\*\*\* to  $p < 0.0001$ .  
404

## 405 Supplemental References

- 406 1. Warmuth M, Kim S, Gu XJ, Xia G, Adrian F. Ba/F3 cells and their use in kinase  
407 drug discovery. *Curr Opin Oncol.* 2007;19(1):55-60.
- 408 2. Sonta SI, Minowada J, Tsubota T, Sandberg AA. Cytogenetic study of a new Ph1-  
409 positive cell line (NALM-1). *Journal of the National Cancer Institute.* 1977;59(3):833-7.
- 410 3. Gasilina A, Premnauth G, Gurjar P, Biesiada J, Hegde S, Milewski D, et al.  
411 IODVA1, a guanidinobenzimidazole derivative, targets Rac activity and Ras-driven cancer  
412 models. *PLoS One.* 2020;15(3):e0229801.
- 413 4. Tasian SK, Loh ML, Hunger SP. Philadelphia chromosome-like acute  
414 lymphoblastic leukemia. *Blood.* 2017;130(19):2064-72.
- 415 5. Roberts KG, Mullighan CG. Genomics in acute lymphoblastic leukaemia: insights  
416 and treatment implications. *Nat Rev Clin Oncol.* 2015;12(6):344-57.
- 417 6. Pui CH, Roberts KG, Yang JJ, Mullighan CG. Philadelphia Chromosome-like  
418 Acute Lymphoblastic Leukemia. *Clin Lymphoma Myeloma Leuk.* 2017;17(8):464-70.
- 419 7. Nieborowska-Skorska M, Kopinski PK, Ray R, Hoser G, Ngaba D, Flis S, et al.  
420 Rac2-MRC-cIII-generated ROS cause genomic instability in chronic myeloid leukemia  
421 stem cells and primitive progenitors. *Blood.* 2012;119(18):4253-63.
- 422 8. Wei J, Wunderlich M, Fox C, Alvarez S, Cigudosa JC, Wilhelm JS, et al.  
423 Microenvironment determines lineage fate in a human model of MLL-AF9 leukemia.  
424 *Cancer Cell.* 2008;13(6):483-95.
- 425 9. Thomas EK, Cancelas JA, Zheng Y, Williams DA. Rac GTPases as key regulators  
426 of p210-BCR-ABL-dependent leukemogenesis. *Leukemia.* 2008;22(5):898-904.
- 427 10. Harnois T, Constantin B, Rioux A, Grenioux E, Kitzis A, Bourmeyster N.  
428 Differential interaction and activation of Rho family GTPases by p210bcr-abl and p190bcr-  
429 abl. *Oncogene.* 2003;22(41):6445-54.
- 430 11. Sahay S, Pannucci NL, Mahon GM, Rodriguez PL, Megjugorac NJ, Kostenko EV,  
431 et al. The RhoGEF domain of p210 Bcr-Abl activates RhoA and is required for  
432 transformation. *Oncogene.* 2008;27(14):2064-71.
- 433 12. Jaffe AB, Hall A. Rho GTPases: biochemistry and biology. *Annu Rev Cell Dev*  
434 *Biol.* 2005;21:247-69.
- 435 13. Loirand G, Pacaud P. The role of Rho protein signaling in hypertension. *Nat Rev*  
436 *Cardiol.* 2010;7(11):637-47.
- 437 14. Newey SE, Velamoor V, Govek EE, Van Aelst L. Rho GTPases, dendritic  
438 structure, and mental retardation. *J Neurobiol.* 2005;64(1):58-74.
- 439 15. Vigil D, Cherfils J, Rossman KL, Der CJ. Ras superfamily GEFs and GAPs:  
440 validated and tractable targets for cancer therapy? *Nat Rev Cancer.* 2010;10(12):842-57.

- 441 16. Zandvakili I, Lin Y, Morris JC, Zheng Y. Rho GTPases: Anti- or pro-neoplastic  
442 targets? *Oncogene*. 2017;36(23):3213-22.
- 443 17. Coleman ML, Marshall CJ, Olson MF. RAS and RHO GTPases in G1-phase cell-  
444 cycle regulation. *Nat Rev Mol Cell Biol*. 2004;5(5):355-66.
- 445 18. Kiosses WB, Shattil SJ, Pampori N, Schwartz MA. Rac recruits high-affinity  
446 integrin alphavbeta3 to lamellipodia in endothelial cell migration. *Nat Cell Biol*.  
447 2001;3(3):316-20.
- 448 19. Sundaresan M, Yu ZX, Ferrans VJ, Sulciner DJ, Gutkind JS, Irani K, et al.  
449 Regulation of reactive-oxygen-species generation in fibroblasts by Rac1. *Biochem J*.  
450 1996;318 ( Pt 2):379-82.
- 451 20. Bustelo XR. RHO GTPases in cancer: known facts, open questions, and therapeutic  
452 challenges. *Biochem Soc Trans*. 2018;46(3):741-60.
- 453 21. Ridley AJ. Rho GTPase signalling in cell migration. *Curr Opin Cell Biol*.  
454 2015;36:103-12.
- 455 22. Steffen A, Ladwein M, Dimchev GA, Hein A, Schwenkmezger L, Arens S, et al.  
456 Rac function is crucial for cell migration but is not required for spreading and focal  
457 adhesion formation. *J Cell Sci*. 2013;126(Pt 20):4572-88.
- 458 23. Zhang SC, Gremer L, Heise H, Janning P, Shymanets A, Cirstea IC, et al. Liposome  
459 reconstitution and modulation of recombinant prenylated human Rac1 by GEFs, GDI1 and  
460 Pak1. *PLoS One*. 2014;9(7):e102425.
- 461 24. Chang KH, Sanchez-Aguilera A, Shen S, Sengupta A, Madhu MN, Ficker AM, et al.  
462 Vav3 collaborates with p190-BCR-ABL in lymphoid progenitor leukemogenesis,  
463 proliferation, and survival. *Blood*. 2012;120(4):800-11.
- 464 25. Thomas EK, Cancelas JA, Chae HD, Cox AD, Keller PJ, Perrotti D, et al. Rac  
465 guanosine triphosphatases represent integrating molecular therapeutic targets for BCR-  
466 ABL-induced myeloproliferative disease. *Cancer Cell*. 2007;12(5):467-78.
- 467 26. Lee LH, Gasilina A, Roychoudhury J, Clark J, McCormack FX, Pressey J, et al.  
468 Real-time genomic profiling of histiocytoses identifies early-kinase domain BRAF  
469 alterations while improving treatment outcomes. *JCI Insight*. 2017;2(3):e89473.
- 470 27. Nouri K, Fansa EK, Amin E, Dvorsky R, Gremer L, Willbold D, et al. IQGAP1  
471 Interaction with RHO Family Proteins Revisited: KINETIC AND EQUILIBRIUM  
472 EVIDENCE FOR MULTIPLE DISTINCT BINDING SITES. *J Biol Chem*.  
473 2016;291(51):26364-76.
- 474
- 475

476 **Figure S1: IODVA1 inhibits the proliferation and survival of BCR-ABL1 expressing**  
477 **cells *in vitro* and *in vivo* and eradicates leukemia-propagating cells in secondary**  
478 **transplants. (A)** Ba/F3 cells transduced with p190-BCR-ABL1 (lilac squares), p210-  
479 BCR-ABL1 (light lilac triangles), or empty vector (black circles) were grown in the  
480 presence of vehicle control or IODVA1 at 1 and 3  $\mu$ M and counted daily for 3 days using  
481 trypan blue exclusion. Mean  $\pm$  SD of a representative experiment done in triplicates is  
482 shown. **(B)** IODVA1-dependent survival curves of empty vector (black circles), p190-  
483 BCR-ABL1 expressing Ba/F3 cells grown in the absence (orange circles) or presence (lilac  
484 circles) of IL-3 and of Nalm-1 cells. Fitting of the data was done in Prism version 8.4.  
485 Combined mean  $\pm$  SEM of all experiments is shown. **(C)** p190-BCR-ABL1 expressing  
486 Ba/F3 cells were allowed to grow for 1 day, treated with IODVA1 (IO1, 1  $\mu$ M) for 1 day,  
487 and washed. Cells were counted for 7 days using trypan blue exclusion. Mean  $\pm$  SD of a  
488 representative experiment done in triplicates is shown. **(D)** Ba/F3 cells stably expressing  
489 p190-BCR-ABL1 were subjected to colony formation assay in soft agar in the presence of  
490 DMSO or IODVA1 (1 or 10  $\mu$ M). Colonies were allowed to form for 10 days then stained  
491 with iodonitrotetrazolium. Data shown are representative of three independent experiments  
492 done in triplicates. Note the smaller colony size in 1  $\mu$ M IODVA1 treatment group. **(E)**  
493 Leukemic burden (%) of treated mice before treatment and at the indicated treatment time  
494 was analyzed by flow cytometry of bone marrow aspirates as population containing  
495 B220<sup>+</sup>/CD43<sup>+</sup> pro-B cells. N = 3 mice per group **(F)** Count (%) of residual leukemic  
496 (EGFP<sup>+</sup>-BCR-ABL1) cells in peripheral blood at weeks 3 and 5 for the secondary  
497 transplant mice from **Fig. 1D**. **(G)** Kaplan-Meier survival plot of secondary mice  
498 transplants with the  $0.3 \times 10^6$  cell-dilution. **(H)** Count (%) of residual leukemic (EGFP<sup>+</sup>-

499 BCR-ABL1) cells in peripheral blood at weeks 3 and 5 for the secondary transplant mice  
500 from (G). (I & J) like G & H but with the  $0.1 \times 10^6$  cell-dilution. N = 5 mice per group in  
501 F-J. \*  $p \leq 0.05$  using One-way ANOVA with Tukey's multiple comparison test.

502

503 **Figure S2: IODVA1 does not affect p190-BCR-ABL1 phosphorylation status.** Ba/F3  
504 cells expressing p190-BCR-ABL1 were treated with vehicle control, imatinib (IM, 1  $\mu$ M),  
505 or IODVA1 (3  $\mu$ M) for 4 h. Lysates were immunoprecipitated with ABL1 antibody and  
506 the protein complex separated on SDS-PAGE and immunoblotted for phosphotyrosine  
507 (pY) and BCR-ABL1 (c-Abl) and quantified. Lysates were also immunoblotted for pCrkl  
508 and total Crkl and quantified. IP – immunoprecipitation, IB – immunoblotting.

509

510 **Figure S3: IODVA1 reduces survival of leukemic cells derived from relapsed and *de***  
511 ***novo* Ph<sup>+</sup>, Ph-like and MLL pediatric patients.** Patient derived xenograft (PDX) cells  
512 were co-cultured *ex vivo* on MS-5 or OP-9 stromal cells and treated with dasatinib (Das,  
513 ABL1-inhibitor), ruxolitinib (Rux, JAK-inhibitor), combination of dasatinib and  
514 ruxolitinib (Das + Rux), abemaciclib (CDK inhibitor), or IODVA1 at the indicated  
515 concentrations and assessed for survival using flow cytometry. (A) Representative survival  
516 of leukemic cells from patients with Ph<sup>+</sup> rearrangements. Cells from sample #2018-136  
517 were also subjected to clonogenic assay. Also note example image from #2017-129 cells  
518 treated with control, dasatinib or IODVA1 showing no effect on cells of normal stroma  
519 (black arrows) (B) Leukemic cells from patients with *de novo* Ph-like leukemia. (C)  
520 Leukemic cells from MLL/AF9 and relapsed MLL/AF1q patients. (D) Cells from PDX Ph-  
521 like cells 2016-79 and 2018-132 with the same (IGH-CRLF2; JAK2) rearrangement were

522 incubated with IODVA1 (1  $\mu$ M) for 4 h, lysed, and immunoblotted for pVAV3 and VAV3;  
523 GAPDH was used as loading control.

524

525 **Figure S4: IODVA1 decreases RAC signaling but does not interfere with the action**  
526 **of the RAC negative regulators GAP or RhoGDI.** (A) Levels of active RAC were

527 assessed using PAK-GBD pull-down assay as was done for **Fig. 3A**, but cells were  
528 incubated for a fixed amount of time (1 h) at the indicated IODVA1 concentrations.

529 Densitometric quantification of active RAC (RAC•GTP) levels were done using ImageJ

530 (B) p190-BCR-ABL1 Ba/F3 cells were treated with IODVA1 (3  $\mu$ M) and levels of active  
531 CDC42 (Cdc42•GTP) and RHOA (Rho•GTP) were assessed by pull-down at the indicated

532 times using GST-PAK-GBD and GST-Rhotekin respectively, followed by  
533 immunoblotting. Levels of active GTPase were assessed using ImageJ as in **S3A**. (C) p190-

534 BCR-ABL1 Ba/F3 cells were treated with IODVA1 (3  $\mu$ M) and lysed at the indicated  
535 times. Cell lysates were separated on SDS-PAGE and immunoblotted for pPAK1/2

536 (T423/T402), pBAD (S136), and BAD. GAPDH was used as loading control. **A – C**  
537 representative blots of two independent experiments. (D) Morphology of GFP<sup>+</sup> leukemic

538 colonies (left panel). Western blot analysis of RAC1 and RAC2 protein expression in  
539 *Rac1<sup>Δ/Δ</sup>+Rac2<sup>-/-</sup>* cells post poly-I:C injections (right panel). (E) Intrinsic (blue line) and

540 p50GAP-stimulated GTP-hydrolysis reaction in the presence (red line) or absence (black  
541 line) of IODVA1. (F) Sedimentation assay of liposomal RAC1-GDP in the presence of

542 RhoGDI1 (4  $\mu$ M) and IODVA1 (2  $\mu$ M). RAC1 was visualized by immunoblotting from  
543 pellet (p) and soluble (s) fractions. (G) Stopped-flow measurement of GDI (10  $\mu$ M)

544 interaction with fluorescently labelled RAC1 in the absence (black line) or presence (red  
545 line) of IODVA1.

546

547 **Figure S5: VAV3-deficient leukemia is not responsive to IODVA1.** (A) Kaplan-Meier  
548 plot showing survival of wild-type or *Vav3*<sup>-/-</sup> p190-BCR-ABL1 leukemic mice post-  
549 treatment with osmotic pumps implanted subcutaneously and carrying vehicle control or  
550 IODVA1 (IO1, 1 mM). N = 5 mice per treatment group. (B) Count (% leukemic progenitors  
551 in peripheral blood) of residual leukemic (EGFP<sup>+</sup>-BCR-ABL1) cells at week 1 and 2 post-  
552 treatment for mice from (A). (C) Bar graph of pharmacodynamic assessment of leukemic  
553 progenitor cells (%) from wild-type or *Vav3*<sup>-/-</sup> mice with p190-BCR-ABL1 leukemia and  
554 treated with vehicle control (black and light grey) or IODVA1 (IO1, dark and light lilac)  
555 following 2-week treatment using phospho-flow analysis of the indicated effectors. (D) Bar  
556 graph summarizing results of the phospho-flow cytometric analysis of the indicated  
557 signaling molecules in the leukemic progenitor bone marrow aspirates of wild-type or  
558 *Vav3*<sup>-/-</sup> mice treated with IODVA1. (E) IODVA1-dependent survival curves of empty  
559 vector- (black lines), wild type full length VAV3- (light lilac lines) or  $\Delta$ CH-mutant of  
560 VAV3- (lilac lines) expressing Ba/F3 cells in the empty vector- or p190-BCR-ABL1-  
561 transduced background. (F) Results of biotinylated-IODVA1 pull-down from PDX Ph<sup>+</sup> B-  
562 ALL 2018-136 and p190-BCR-ABL1-Ba/F3 cell lysates. Neutravidin bead-bound protein  
563 complexes were washed, separated on SDS-PAGE, and immunoblotted for PREX1,  
564 VAV3, and VAV1. Results are representative of at least two independent experiments. (G)  
565 pVAV3 levels in the bone marrow aspirates of PDX 2018-136 engrafted mice treated with  
566 vehicle control or dasatinib at the time of sacrifice or IODVA1 (IO1) at the end of



567 treatment. Representative blot of two experiments, n = 3 mice per group. \*  $p \leq 0.05$ ; \*\*  $p$   
568  $\leq 0.01$ , \*\*\*  $p \leq 0.001$ , \*\*\*\*  $p < 0.0001$  using One-way ANOVA with Tukey's multiple  
569 comparison test.  
570

571 **Supplemental Table Legend**

572

573 **Table S1:** List of ALL patients with samples available through the Pediatric Leukemia  
574 Avatar Program at CCHMC, including those with cytokine receptor, tyrosine kinase (TK),  
575 or RAS pathway mutations. Clinical history of TKI treatment is indicated with the TKI  
576 received. All samples have confirmed patient-derived xenografts (PDXs) with disease  
577 latency as noted. Highlighted samples indicate those selected for Ph<sup>+</sup>/Ph-like cohort.  
578 Patient samples that have established in vitro culture are marked (\*). Next-Gen Sequencing  
579 (NGS) was performed using the FoundationOne Heme Panel (Cambridge, MA). Other  
580 abbreviations: relapsed or refractory (R/R), busulfan (BU), Philadelphia chromosome  
581 (Ph<sup>+</sup>), Philadelphia-like (Ph-like), minimal residual disease (MRD), bone marrow  
582 transplant (BMT).

**Figure S1**

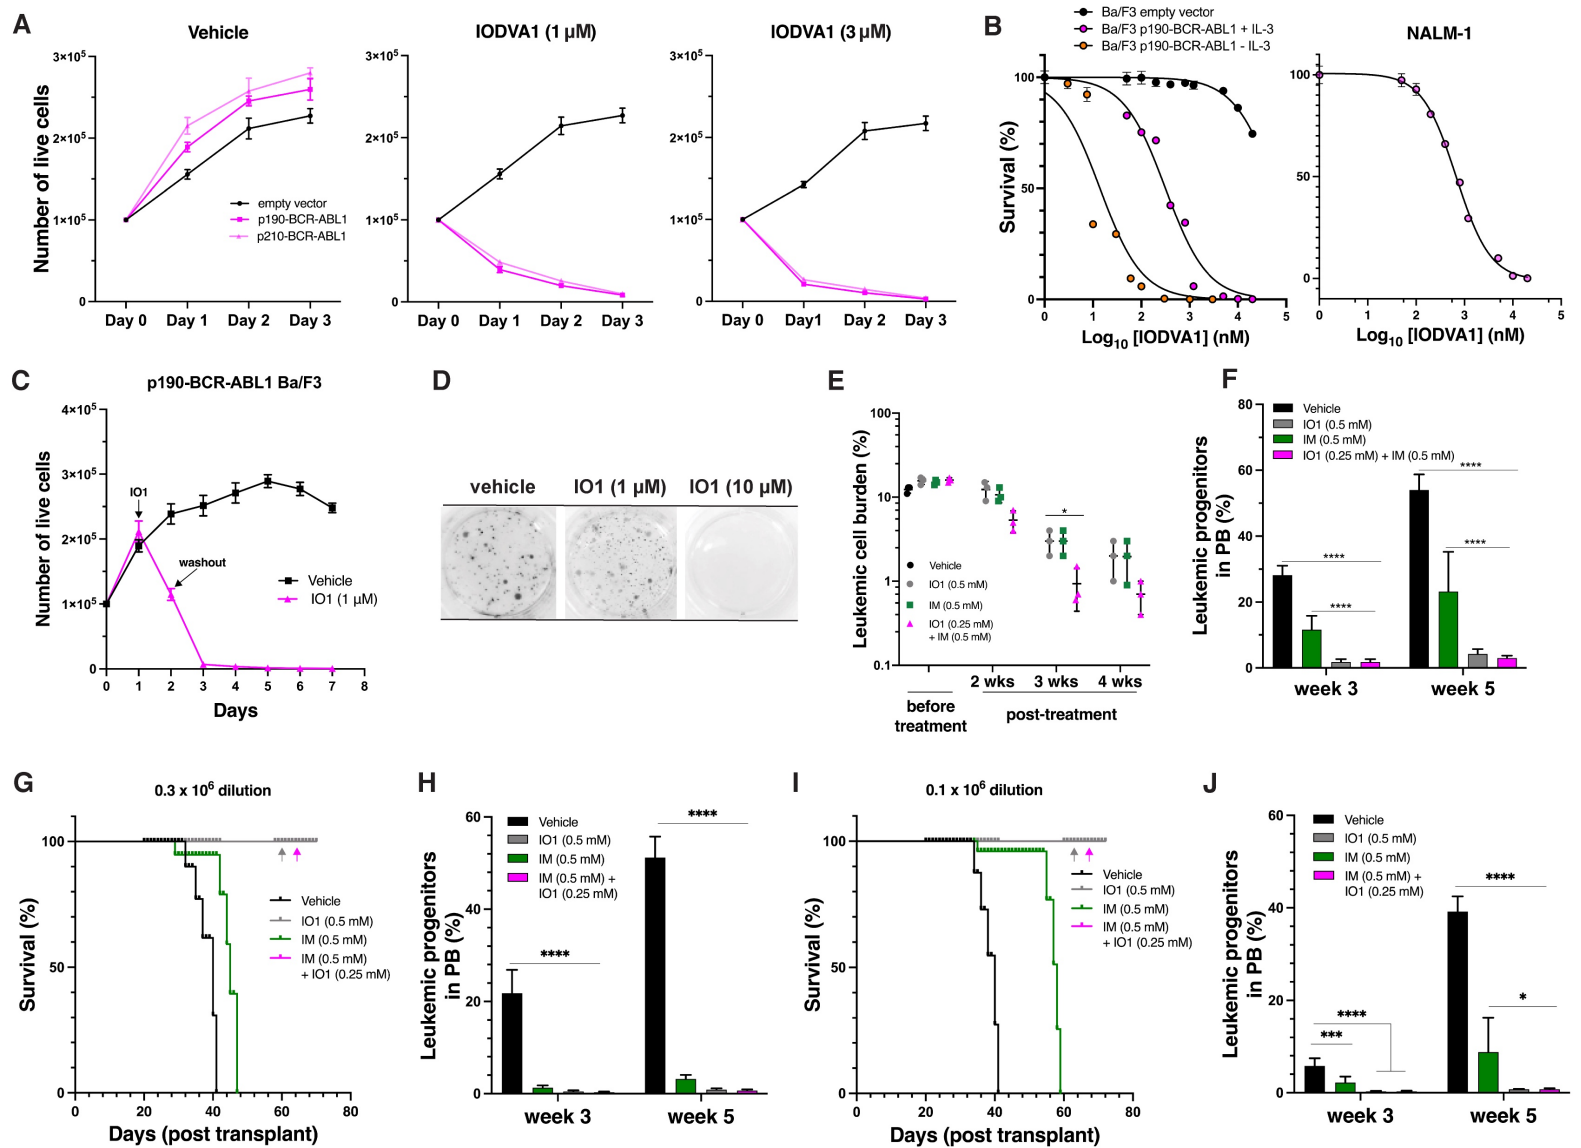

**Figure S2**

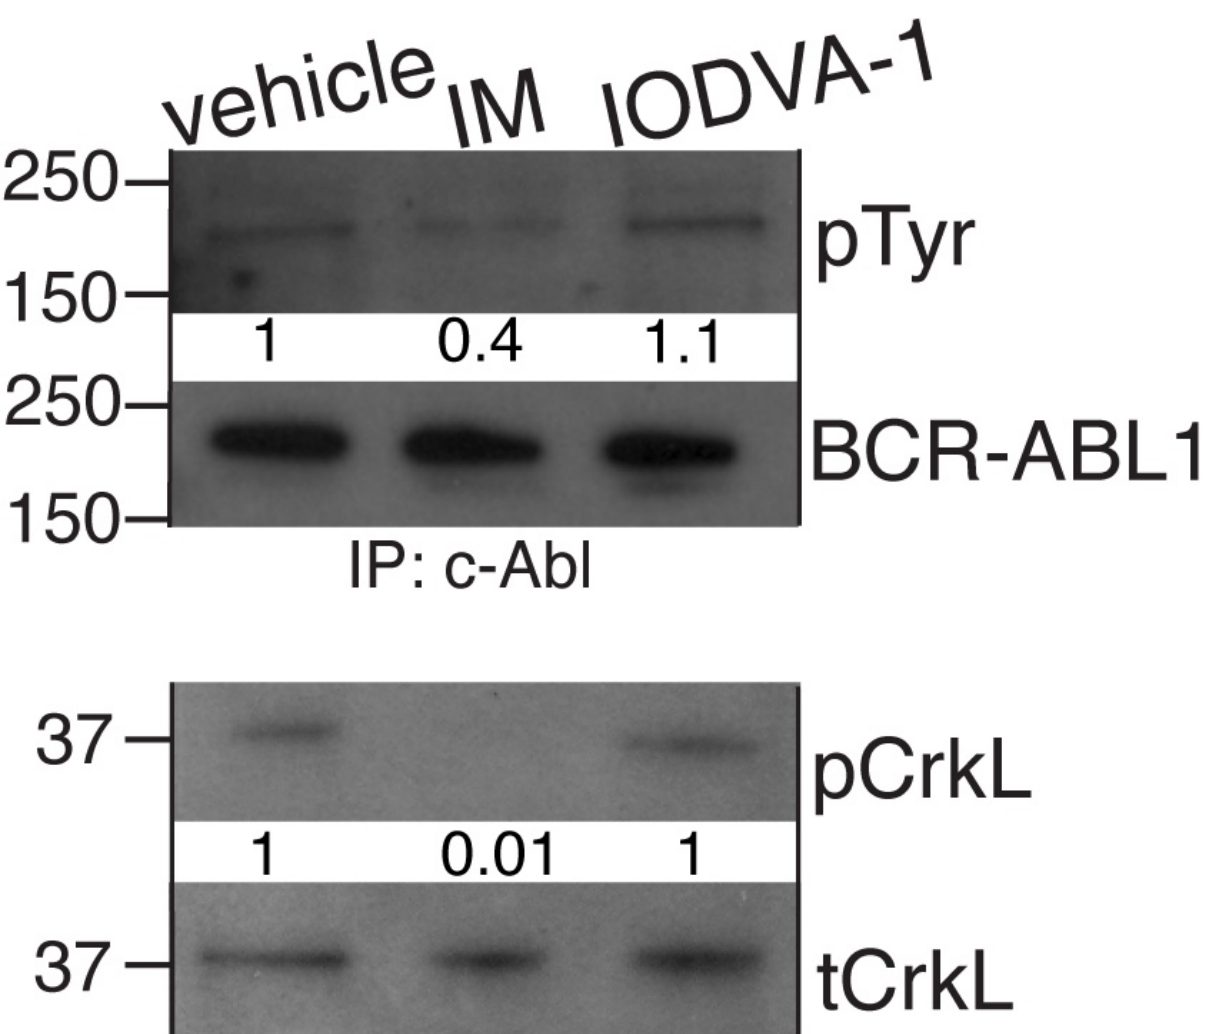

**Figure S3**

**A Patient samples with Ph<sup>+</sup> rearrangements**

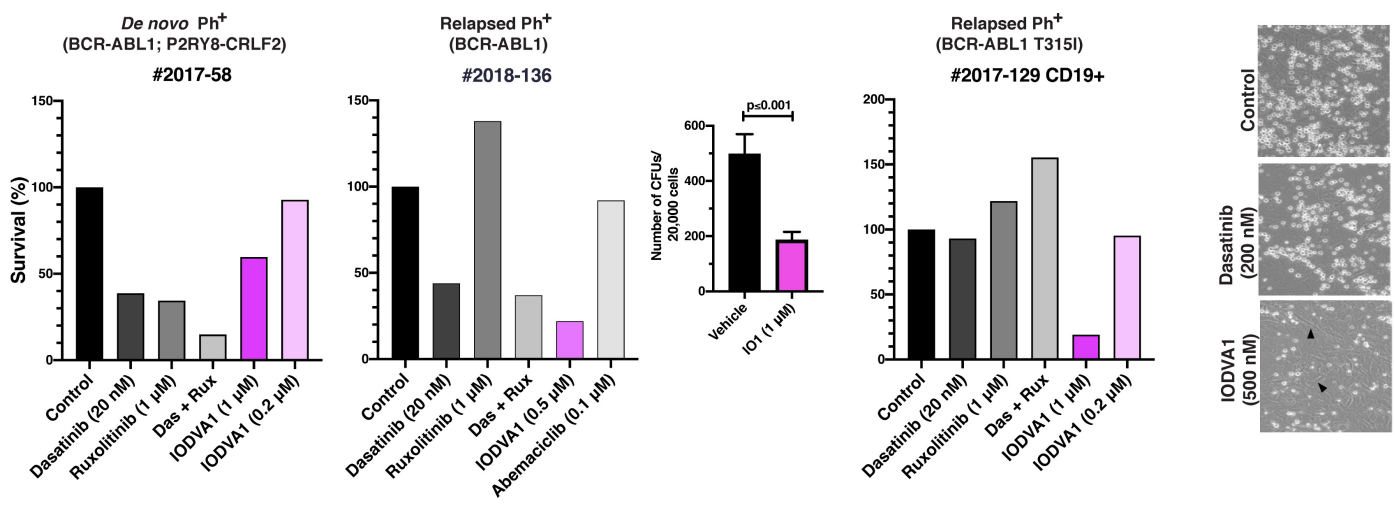

**B Patient samples with de novo Ph-like rearrangements**

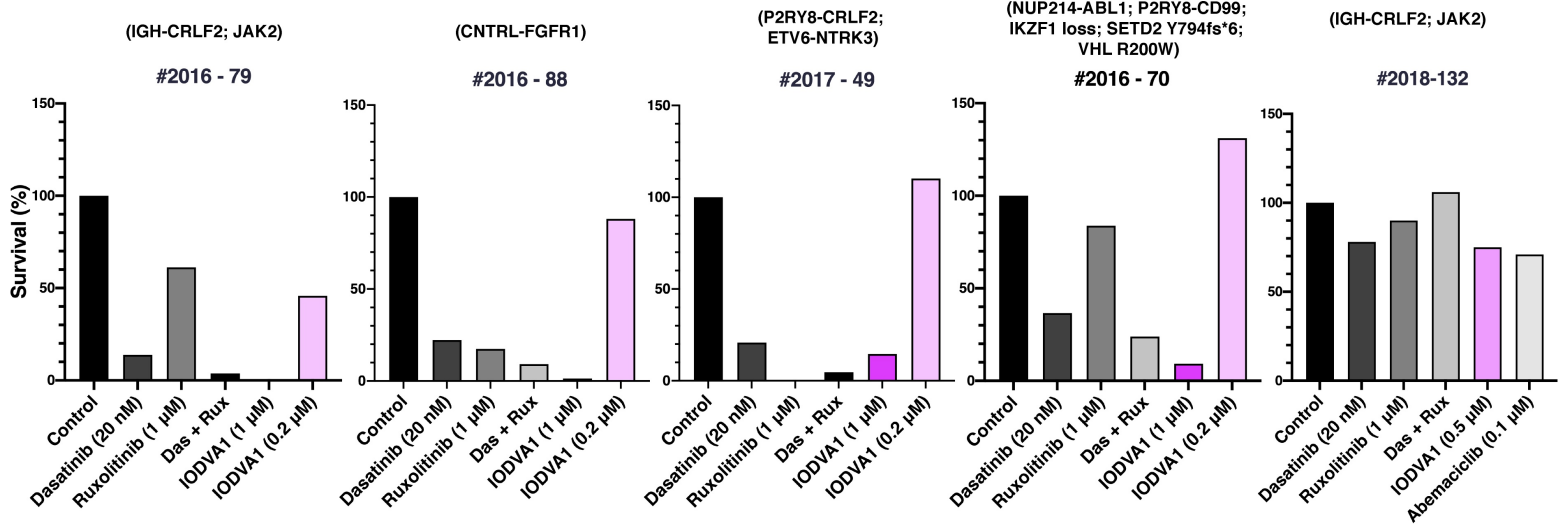

**C Patient samples with MLL rearrangements**

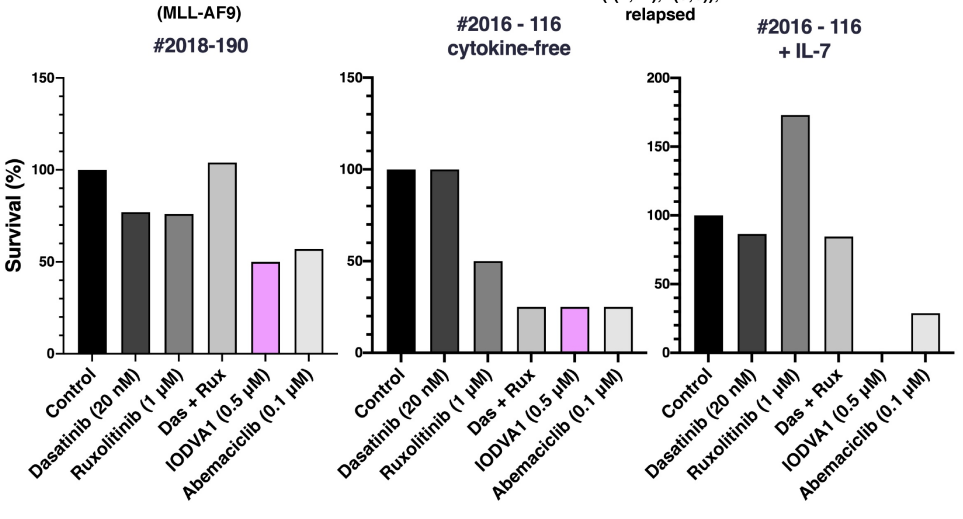

**D**

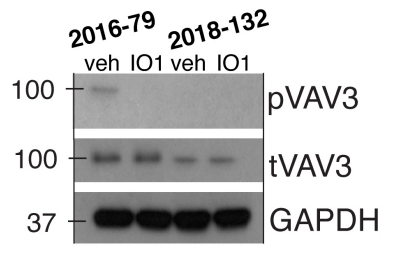

**Figure S4**

**A**

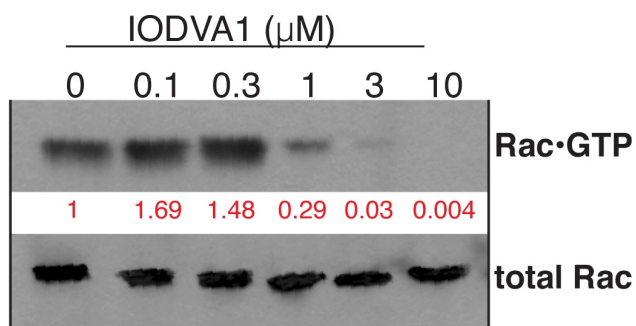

**B**

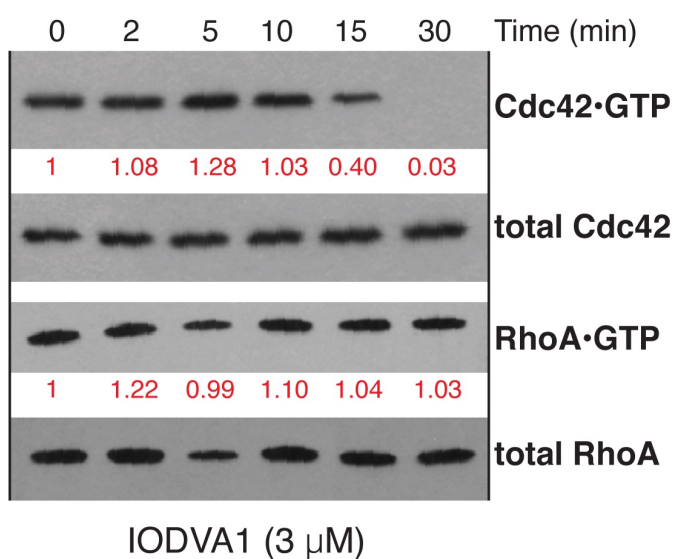

**C**

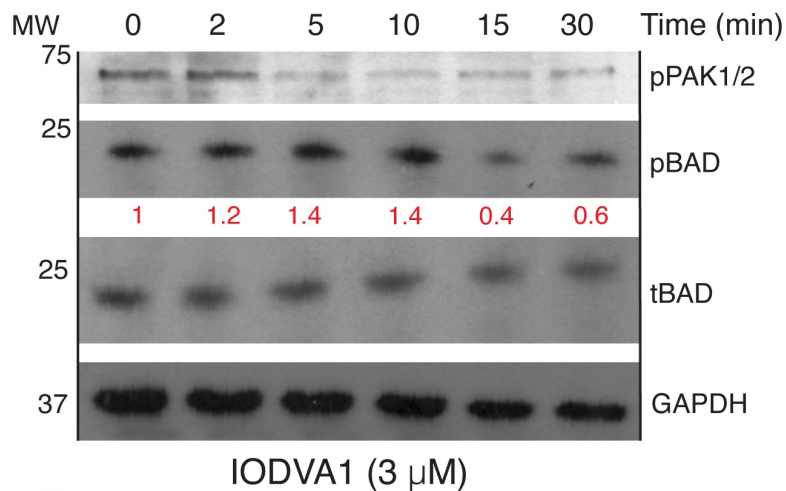

**D**

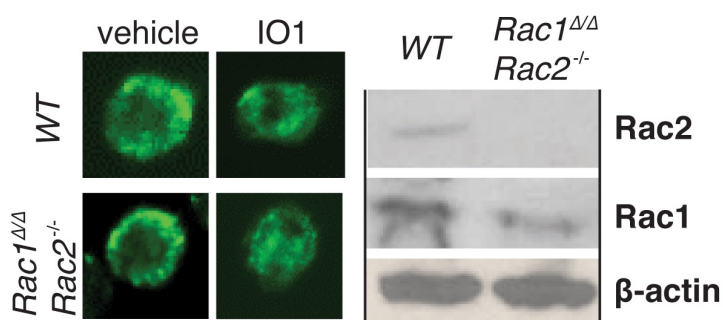

**E**

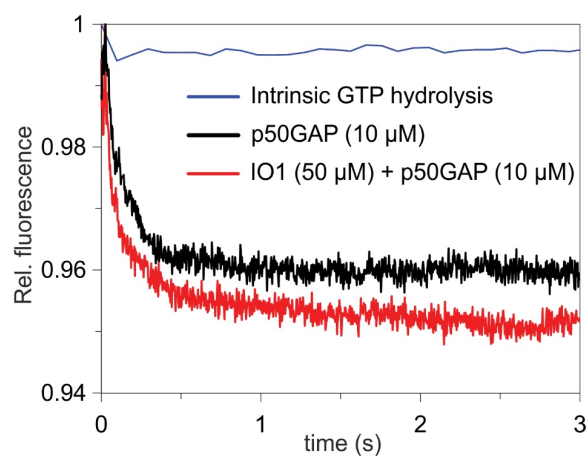

**F**

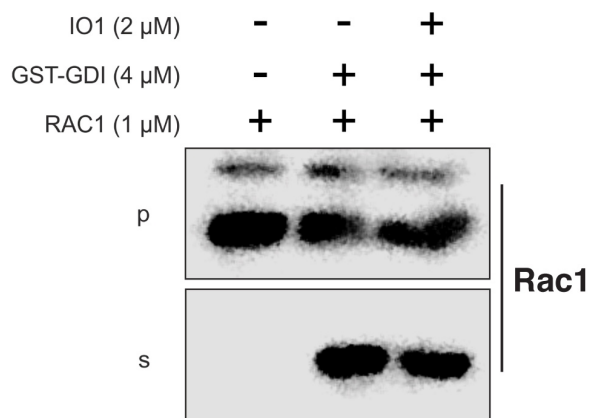

**G**

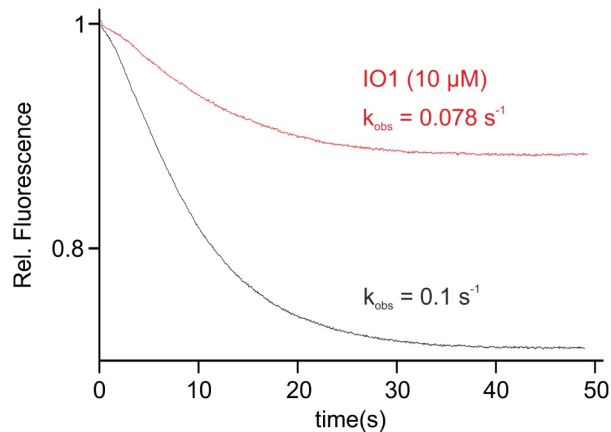

**Figure S5**

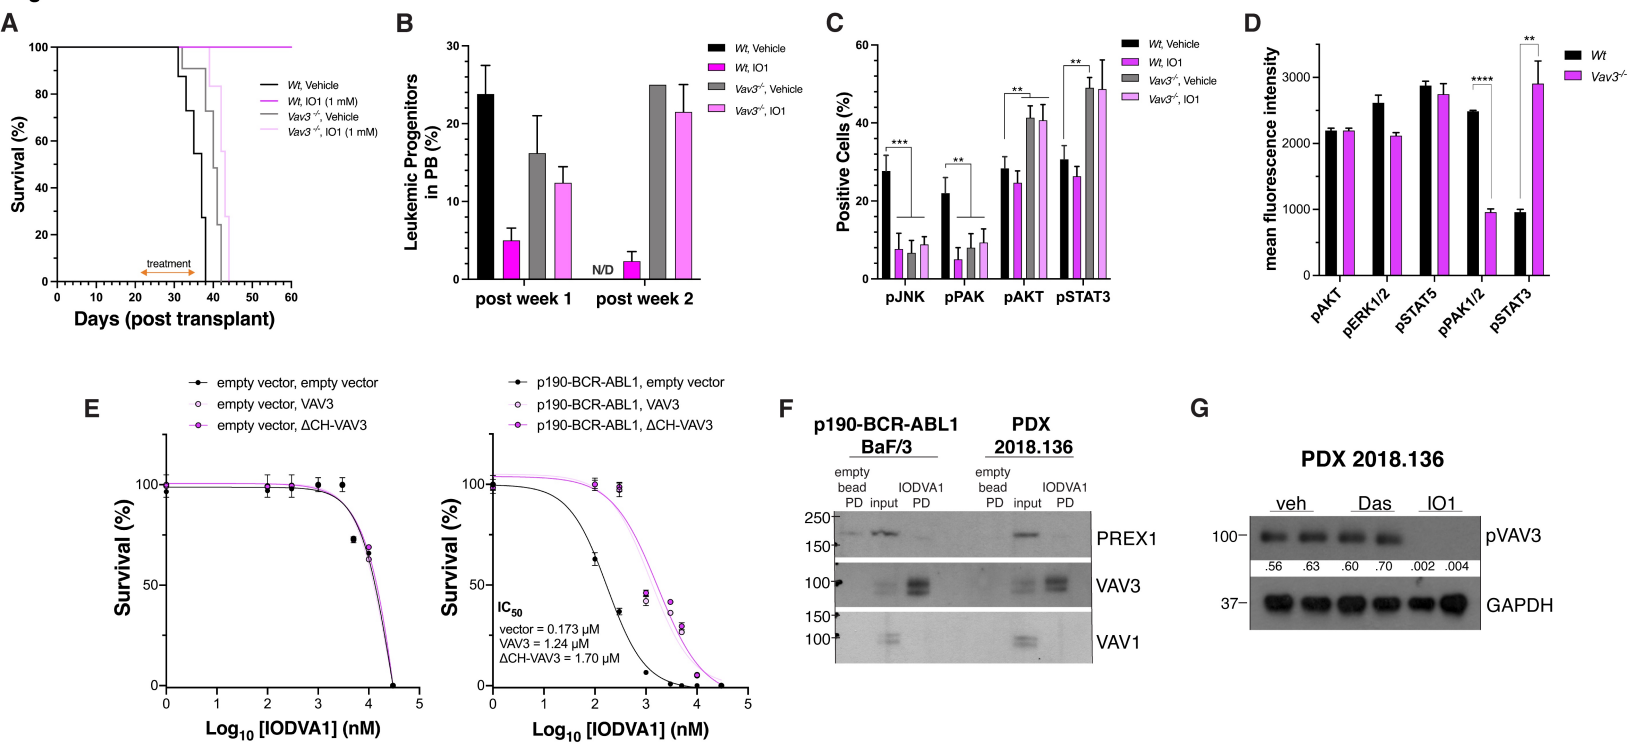

**Table S1**

| PDX ALL models |            |               |                                                       |               |
|----------------|------------|---------------|-------------------------------------------------------|---------------|
| Patient #      | Sample ID  | Disease Stage | Mutations/Group                                       | TKI History   |
| ALL-009        | 2016-116 * | R/R           | t(1;11), t(6;6)                                       |               |
| ALL-011        | 2016-79    | De Novo       | Ph-like (IGH-CRLF2; JAK2)                             | Ruxolitinib   |
| ALL-012        | 2016-88    | De Novo       | Ph-like (CNTRL-FGFR1)                                 |               |
| ALL-014        | 2017-49    | De Novo       | Ph-like (P2RY8-CLRF2; ETV6-NTRK3)                     | Larotrectinib |
| ALL-015        | 2017-58 *  | De Novo       | Ph+ (BCR-ABL1); Ph-like (P2RY8-CRLF2)                 | Dasatinib     |
| ALL-017        | 2017-129 * | R/R           | Ph+ (BCR-ABL1, T315I)                                 | Ponatinib     |
| ALL-019        | 2018-132   | De Novo       | Ph-like (IGH-CRLF2; JAK2)                             |               |
| ALL-004        | 2018-136   | R/R           | Ph+ (BCR-ABL1)                                        |               |
| ALL-032        | 2018-190   | De novo       | B-ALL (MLL/AF9)                                       |               |
| ALL-011        | 2016-70    | De novo       | Ph-like (NUP214/ABL1, IKZF-1, P2RY8/CD99, SETD2, VHL) |               |
